# Supplementary material
Source: MDPI journal article supplement (https://www.mdpi.com/2073-4441/13/3/375)

Figure S1. Sampling station locations for soluble reactive phosphorus boundary condition determination: Michigan Tech survey (filled circles) and Environment Canada survey (open circles). Diamonds represent (west to east): Highland Creek WWTP, Duffin Creek WWTP and Corbett Creek WWTP.

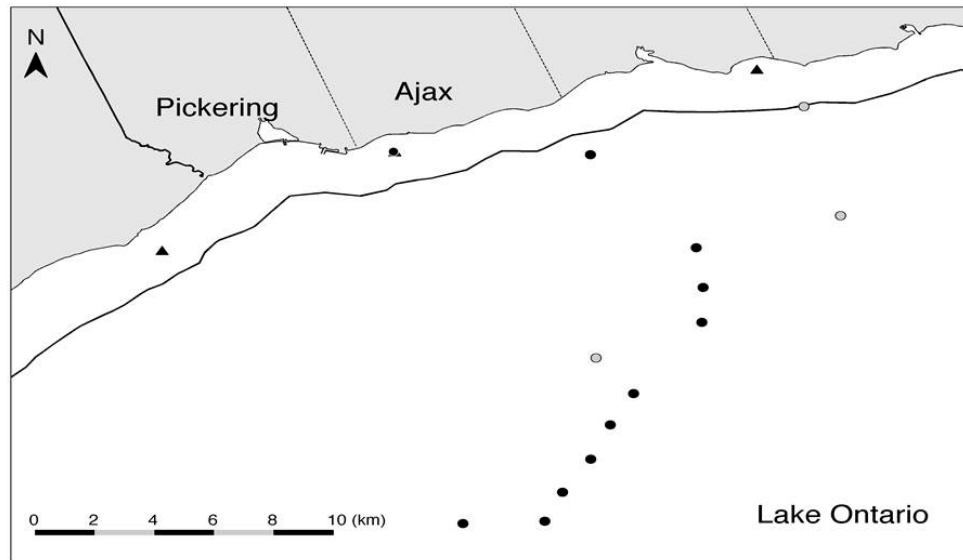

Figure S2. Sampling locations for model calibration: circles represent Toronto and Region Conservation Authority SRP monitoring stations. Square is Ministry of the Environment, Conservation and Parks chlorophyll monitoring buoy. Diamonds represent (west to east): Highland Creek WWTP, Duffin Creek WWTP and Corbett Creek WWTP.

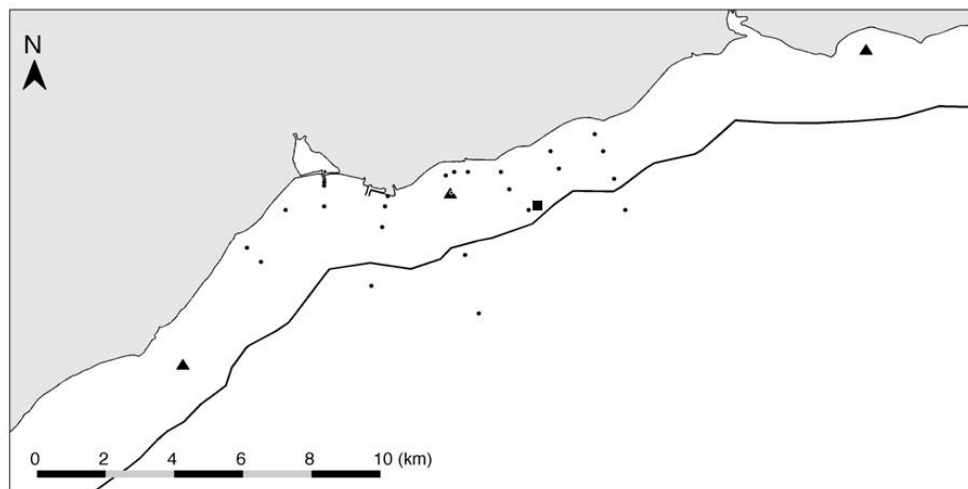

Supplement: s1 [file s1]
